# Supplementary material for: Feedback regulation ofDrosophilaBMP signaling by the novel extracellular protein Larval Translucida
Source: Oxford University Press journal article supplement (doi:10.1242/dev.059477), 2011-01-25
Supplement: dev059477tables1.pdf [file dev059477tables1.pdf]

**Table S1. Phenotypes associated with transheterozygotic combinations of *Itl* alleles**

|                         | <i>Itl</i> <sup>1</sup>   | <i>Itl</i> <sup>2</sup>   | <i>Itl</i> <sup>N</sup>   | <i>Itl</i> <sup>3</sup> | <i>Itl</i> <sup>4</sup> |
|-------------------------|---------------------------|---------------------------|---------------------------|-------------------------|-------------------------|
| <i>Itl</i> <sup>1</sup> | Larval lethal,<br>bloated |                           |                           |                         |                         |
| <i>Itl</i> <sup>2</sup> | Larval lethal,<br>bloated | Larval lethal,<br>bloated |                           |                         |                         |
| <i>Itl</i> <sup>N</sup> | Larval lethal,<br>bloated | Larval lethal,<br>bloated | Larval lethal,<br>bloated |                         |                         |
| <i>Itl</i> <sup>3</sup> | Pupal lethal,<br>bloated  | Pupal lethal,<br>bloated  | Pupal lethal,<br>bloated  | Viable, no<br>phenotype |                         |
| <i>Itl</i> <sup>4</sup> | Viable, ectopic<br>veins  | Viable, ectopic<br>veins  | Viable, ectopic<br>veins  | Viable, no<br>phenotype | Viable, no<br>phenotype |
